# Supplementary material for: The role of the tissue factor and its inhibitor in the development of subclinical atherosclerosis in people living with HIV
Source: PubMed Central journal article supplement (PMC5531520; doi:10.1371/journal.pone.0181533), 2017-07-27
Supplement: pone.0181533.s002.pdf [file pone.0181533.s002.pdf]

S1 Table. Study group, characteristic of subgroups with TF<450pg/ml and >450pg/ml

| Parameter                                | TF                     |                        | p-value      |
|------------------------------------------|------------------------|------------------------|--------------|
|                                          | < 450 pg/ml            | >450 pg/ml             |              |
| Route of infection HTX/IDU/MSM (%)       | 24.8 / 47.5 / 27.7     | 38.9 /27.8 / 33.3      | 0.1          |
| Duration of HIV infection, (years)*      | 8 (3 -7 23)            | 11 (8 - 18)            | 0.059        |
| AIDS, n (%)                              | 30 (29.7%)             | 3 (16%)                | 0.26         |
| HCV co-infection, n (%)                  | 25 (24.75%)            | 1 (5.6%)               | 0.069        |
| Past HBV infection, n (%)                | 56 (55.45%)            | 8 (44.45%)             | 0.39         |
| Current CD4+ T cells (cells/ $\mu$ l) *  | 499 (384 - 648)        | 673 (477 - 794)        | <b>0.031</b> |
| Nadir CD4+ T cells, (cells/ $\mu$ m)*    | 233 (93 - 349)         | 137 (46 - 274)         | 0.086        |
| Current HIV RNA, (copies/ml)*            | 40 (40 - 50)           | 44.5 (40 - 49)         | 0.29         |
| Undetectable HIV RNA, n (%)              | 22 (22.5%)             | 18 (100%)              | <b>0.026</b> |
| Zenith HIV RNA (copies/ml)*              | 32150 (6581– 149720)   | 64300 (35825 - 226130) | <b>0.07</b>  |
| ARV treatment, n (%)                     | 88 (87.12%)            | 18 (100%)              | 0.11         |
| Duration of ARV treatment, (years)*      | 4 (1.6 - 8)            | 9 (6 - 11)             | <b>0.002</b> |
| Cumulative NRTI treatment time (years)*  | 6.44 (2.173 -- 11.667) | 13.13 (5.73 -- 17.18)  | <b>0.008</b> |
| Cumulative NNRTI treatment time (years)* | 0 (0 - 1.35)           | 0 (0 - 2.42)           | 0.76         |
| Cumulative PI treatment time (years)*    | 2.25 (0 - 5.822)       | 7.115 (3.91 - 10.06)   | <b>0.006</b> |
| Cumulative ARV treatment time (years)*   | 11.71 (3.98 - 20.965)  | 21.305 (14.68 - 27.14) | <b>0.003</b> |
